# Supplementary material
Source: PubMed Central journal article supplement (PMC2613637)

constructs in the presence or absence of a HA-Ubiquitin expressing plasmid, with immunoprecipitated (IP) MafA was subjected to  $\alpha$ -HA western blot (WB).

Supplemental Fig. 1. The S65A mutation does not effect MafA nuclear localization, although amino acids 234-359 appear to be involved in this process. MafA wt (1-359), MafA S65A (1-359), and MafA (1-233) were transfected into HeLa cells and immuno-staining was performed with  $\alpha$ -MafA antiserum. There is no consensus nuclear localization signal in MafA, as analyzed using the PridctNLS Server.

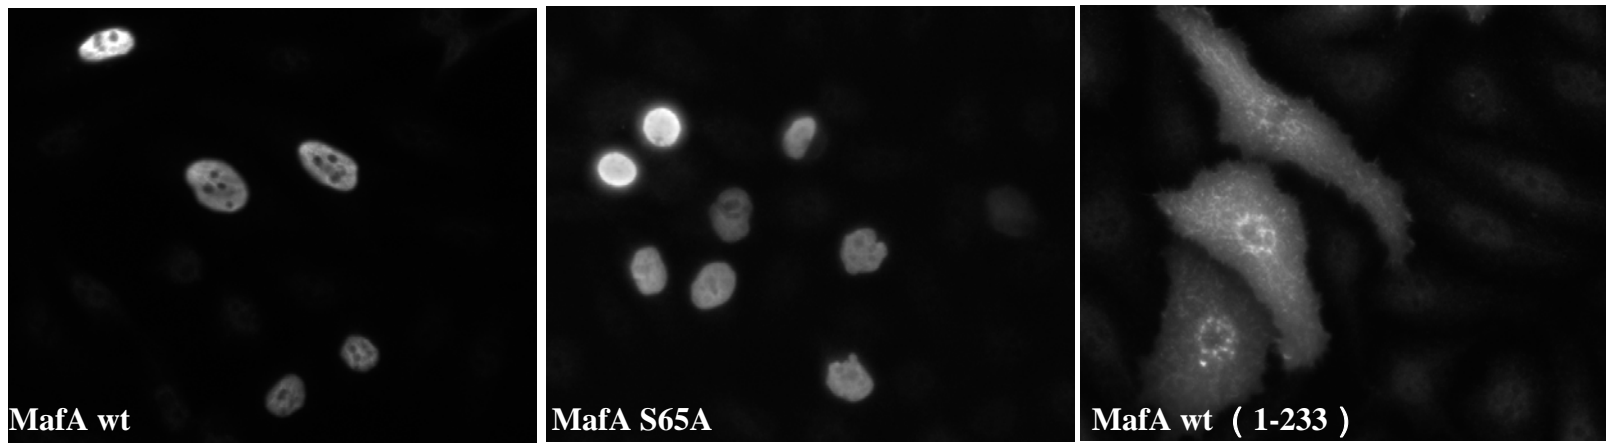

Supplement: M806314200_1.pdf [file M806314200_1.pdf]
